# Supplementary material
Source: Springer Nature journal article supplement (https://www.springermedizin.de/resource/supplementary/12889_2008_1221_MOESM1_ESM.pdf/9502720)

**Study population**

98,657 in the catchment area of Reus and Deltebre (Catalonia)

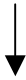

**Random sample**

General population >45 years assigned to the Primary Care centres by the NHS  
750 subjects

**Excluded**

Clinical history of CVD;n=30

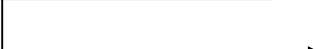

**Population study sample**

720 subjects

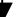

**Cohort with MS (NCEP criteria):  
210 individuals**

**Cohort without MS (NCEP criteria):  
510 individuals**

**29 lost to follow-up**

8 deaths from CVD  
7 non-CVD deaths  
7 moved from area  
7 not known

11 lost to follow-up:  
4 deaths from CVD  
2 non-CVD deaths  
3 moved from area  
2 not known

18 lost to follow-up:  
4 deaths from CVD  
5 non-CVD deaths  
4 moved from area  
5 not known

**142 complications:**

30 coronary  
24 cerebrovasculars  
35 peripheral  
18 retinopathy  
29 nephropathy  
6 neuropathy

**86 complications:**  
15 coronary  
12 cerebrovascular  
18 peripheral  
11 retinopathy  
25 nephropathy  
5 neuropathy

**56 complications:**  
15 coronary  
12 cerebrovascular  
17 peripheral  
7 retinopathy  
4 nephropathy  
1 neuropathy

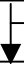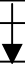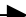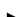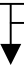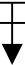

Supplement: MOESM1 [file 9502720]
